# Supplementary material
Source: HighWire-hosted journal article supplement (https://ajnr-sso.highwirestaging.com/highwire/filestream/70648/field_highwire_adjunct_files/0/19-00080.pdf)
Supplement: 19-00080.pdf [file 19-00080.pdf]

**On-line Table 1: MR imaging parameters**

| Parameter              | Fast Spin-Echo Sequence <sup>a</sup> |                                 |                                                |           |                              |                                             |
|------------------------|--------------------------------------|---------------------------------|------------------------------------------------|-----------|------------------------------|---------------------------------------------|
|                        | Sagittal T1                          | Sagittal T2 with Fat Saturation | Sagittal T1 with Fat Saturation and Gadolinium | Axial T1  | Axial T2 with Fat Saturation | Axial T1 with Fat Saturation and Gadolinium |
| TR (ms) <sup>b</sup>   | 550–742                              | 3891–5749                       | 550–811                                        | 736–883   | 5196–5577                    | 700–888                                     |
| TE (ms) <sup>b</sup>   | 8.3–9.1                              | 101.1–105.1                     | 8.3–8.9                                        | 8.7–9.2   | 102.5–108                    | 8.7–9.5                                     |
| Section thickness (mm) | 4                                    | 4                               | 4                                              | 5         | 5                            | 5                                           |
| NEX                    | 1                                    | 2                               | 1.5                                            | 1         | 2                            | 1.5                                         |
| Echo-train length      | 2                                    | 23                              | 2                                              | 4         | 23                           | 3                                           |
| FOV (mm)               | 280 × 280                            | 280 × 280                       | 280 × 280                                      | 180 × 180 | 180 × 180                    | 180 × 180                                   |
| Image size (pixels)    | 512 × 512                            | 512 × 512                       | 512 × 512                                      | 512 × 512 | 512 × 512                    | 512 × 512                                   |

<sup>a</sup> Sequences were performed without fat saturation unless otherwise specified.

<sup>b</sup> Some values varied slightly between patients, and the range is provided.

**On-line Table 2: Comparison of clinical features and imaging findings on each side of the low back**

| Subject | Clinical Confidence, Right | Clinical Confidence, Left | Tenderness, Right | Tenderness, Left | Positive Loading Maneuver | High MRI Score and/or FDG Activity, Right | High MRI Score and/or FDG Activity, Left |
|---------|----------------------------|---------------------------|-------------------|------------------|---------------------------|-------------------------------------------|------------------------------------------|
| 1       | 80%–100%                   | 60%–80%                   | Yes               | Yes              | Yes                       | No                                        | No                                       |
| 2       | Not suspected              | 80%–100%                  | No                | Yes              | Yes                       | No                                        | Yes                                      |
| 3       | 60%–80%                    | 60%–80%                   | Yes               | Yes              | No                        | Yes                                       | Yes                                      |
| 4       | 60%–80%                    | 60%–80%                   | Yes               | Yes              | Yes                       | Yes                                       | Yes                                      |
| 5       | 60%–80%                    | Not suspected             | No                | No               | No                        | No                                        | Yes                                      |
| 6       | 80%–100%                   | 80%–100%                  | Yes               | Yes              | Yes                       | No                                        | No                                       |
| 7       | 80%–100%                   | Not suspected             | Yes               | No               | Yes                       | Yes                                       | No                                       |
| 8       | 80%–100%                   | Not suspected             | Yes               | Yes              | Yes                       | Yes                                       | Yes                                      |
| 9       | 80%–100%                   | 80%–100%                  | No                | No               | Yes                       | Yes                                       | Yes                                      |
| 10      | 60%–80%                    | 60%–80%                   | Yes               | Yes              | No                        | Yes                                       | No                                       |

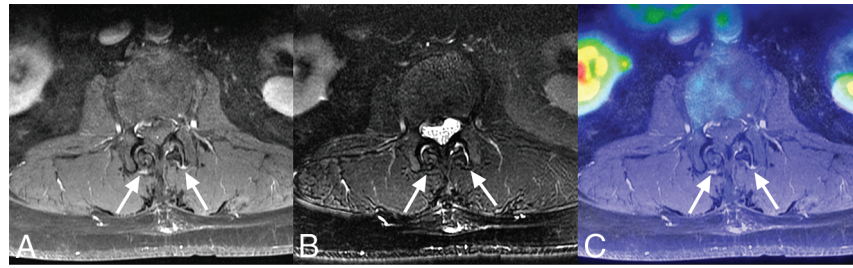

**ON-LINE FIG 1.** Low-grade perfacet enhancement with normal T2 signal and FDG activity. An axial fat-suppressed T1-weighted image with gadolinium demonstrates low-grade enhancement of the bilateral L1-L2 facet joint capsule posteriorly (arrows, A). No signal abnormality is discernable in this region on an axial fat-suppressed T2-weighted image (arrows, B), and no substantial FDG activity near the area of enhancement is evident on a fused PET/MR image (arrows, C).

**On-line Table 3: Comparison of planned treatment, imaging findings, clinical concordance, and potential to change management with a hypothetical biomarker-directed treatment prescription**

| Subject | Planned Treatment                        | MRI-Positive (Grades per Facet, Bone)                                                | FDG-Positive (Grade)                                     | Clinically Concordant to Right Side | Clinically Concordant to Left Side | No Change <sup>a</sup> (No.) | Newly Treated <sup>b</sup> (No.) | Treatment Averted <sup>b</sup> (No.) |
|---------|------------------------------------------|--------------------------------------------------------------------------------------|----------------------------------------------------------|-------------------------------------|------------------------------------|------------------------------|----------------------------------|--------------------------------------|
| 1       | L5-S1 R<br>L5-S1 L                       | None                                                                                 | None                                                     | No                                  | No                                 | 0/2                          | 0                                | 2/2                                  |
| 2       | L4-L5 L<br>L5-S1 L                       | L4-L5 L (III, 0)<br>L5-S1 L (III, 0)                                                 | L4-L5 L (I)<br>L5-S1 L (I)                               | Yes                                 | Yes                                | 2/2                          | 0                                | 0/2                                  |
| 3       | L4-L5 R<br>L4-L5 L<br>L5-S1 R<br>L5-S1 L | L3-L4 R (IV, II)<br>L3-L4 L (IV, III)                                                | L3-L4 R (III)<br>L3-L4 L (III)                           | Yes                                 | Yes                                | 0/4                          | 2                                | 4/4                                  |
| 4       | L4-L5 R<br>L4-L5 L<br>L5-S1 R<br>L5-S1 L | L5-S1 R (IV, II)<br>L5-S1 L (IV, III)                                                | L5-S1 R (II)<br>L5-S1 L (III)                            | Yes                                 | Yes                                | 2/4                          | 0                                | 2/4                                  |
| 5       | None (pain on right) <sup>c</sup>        | L4-L5 L (III, 0)                                                                     | L4-L5 L (I)                                              | No                                  | No                                 | 0/0                          | 1                                | 0/0                                  |
| 6       | L4-L5 R<br>L4-L5 L<br>L5-S1 R<br>L5-S1 L | None                                                                                 | None                                                     | No                                  | No                                 | 0/4                          | 0                                | 4/4                                  |
| 7       | L1-L2 R<br>L2-L3 R                       | L2-L3 R (III, 0)<br>L3-L4 R (IV, I)<br>L4-L5 R (III, I)                              | L2-L3 R (I)<br>L3-L4 R (II)                              | Yes                                 | Yes                                | 1/2                          | 2                                | 1/2                                  |
| 8       | L3-L4 L<br>L4-L5 L<br>L5-S1 L            | L2-L3 R (III, 0)<br>L3-L4 R (III, II)<br>L4-L5 R (III, 0)<br>L4-L5 L (III, 0)        | L2-L3 R (I)<br>L4-L5 R (I)<br>L4-L5 L (II)               | No                                  | Yes                                | 1/3                          | 3                                | 2/3                                  |
| 9       | L4-L5 R<br>L4-L5 L<br>L5-S1 R<br>L5-S1 L | L3-L4 R (III, III)<br>L3-L4 L (III, III)<br>L4-L5 R (III, III)<br>L4-L5 L (III, III) | L3-L4 R (I)<br>L3-L4 L (I)<br>L4-L5 R (I)<br>L4-L5 L (I) | Yes                                 | Yes                                | 2/4                          | 2                                | 2/4                                  |
| 10      | L4-L5 R<br>L4-L5 L<br>L5-S1 R<br>L5-S1 L | L3-L4 R (II, III)<br>L4/L5 R (I, III)<br>L5-S1 R (IV, III)                           | L5-S1 R (II)                                             | Yes                                 | No                                 | 2/4                          | 1                                | 2/4                                  |
| Total   | 29                                       | 21                                                                                   | 17                                                       | 6                                   | 6                                  | 10                           | 11                               | 19                                   |

<sup>a</sup> Considers facet joints designated for planned treatment.

<sup>b</sup> Based on assumption that high-grade MR imaging/FDG findings positive for increased activity are biomarkers in the theoretic new image-directed treatment plan.

<sup>c</sup> Clinical plan of physical therapy; specific levels for treatment are not identified.

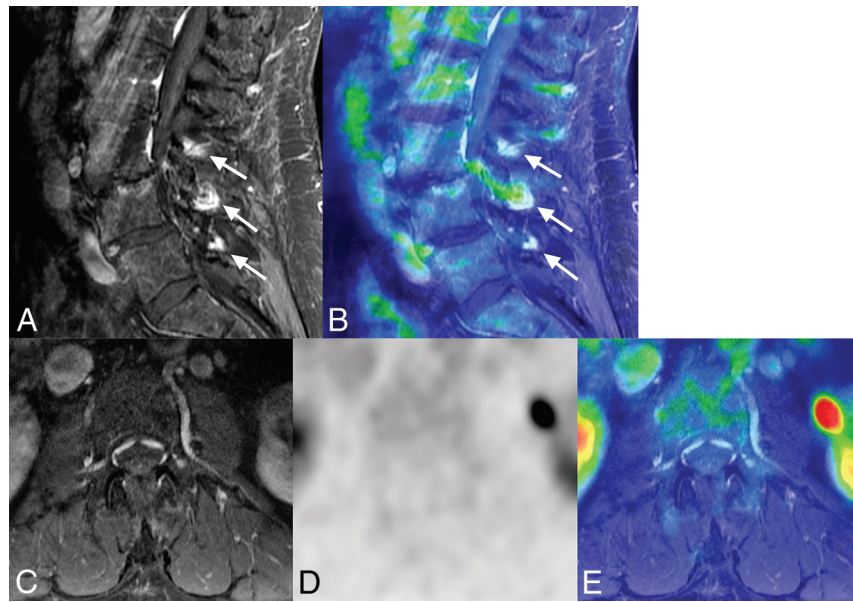

**ON-LINE FIG 2.** Partially concordant clinical and imaging findings for implicated facet joints. Both sides were concordant, with pain on the right but not the left. Clinically, the right L1–L2 and L2–L3 facet joints were initially prescribed treatment. MR imaging demonstrates high-grade perifacet enhancement on the right at L2–L3, L3–L4, and L4–L5, most marked about the inferior recess levels, as seen on the sagittal T1-weighted fat-suppressed postgadolinium image (arrows, A). A sagittal fused PET/MR imaging demonstrates increased FDG activity of these facet joints, most marked at L3–L4 (arrows, B). There is no increased FDG activity or high-grade MR imaging scores on the left (not shown). Axial T1-weighted fat-suppressed postgadolinium image at the L1–L2 level (C), one of the originally implicated levels clinically, demonstrates no increased perifacet enhancement. There is also no increased FDG activity at the L1–L2 level on corresponding PET or fused PET/MR images (D and E).
